# Supplementary material
Source: PubMed Central journal article supplement (PMC6599641)
Supplement: NIHMS1527267-supplement-1.pdf [file NIHMS1527267-supplement-1.pdf]

## **Supplementary Information:**

### **Mechanistic identification of biofluid metabolite changes as markers of acetaminophen-induced liver toxicity in rats**

Venkat R. Pannala<sup>1,2,\*</sup>, Kalyan C. Vinnakota<sup>1,2</sup>, Kristopher D. Rawls<sup>3</sup>, Shanea K. Estes<sup>4</sup>, Tracy P. O'Brien<sup>4</sup>, Richard L. Printz<sup>4</sup>, Jason A. Papin<sup>3</sup>, Jaques Reifman<sup>2</sup>, Masakazu Shiota<sup>4</sup>, Jamey D. Young<sup>4,5,\*</sup> & Anders Wallqvist<sup>2,\*</sup>

<sup>1</sup>The Henry M. Jackson Foundation for the Advancement of Military Medicine, Inc., Bethesda, MD 20817, USA

<sup>2</sup>Department of Defense Biotechnology High Performance Computing Software Applications Institute, Telemedicine and Advanced Technology Research Center, U.S. Army Medical Research and Materiel Command, Fort Detrick, MD 21702, USA

<sup>3</sup>Department of Biomedical Engineering, University of Virginia, Box 800759, Health System, Charlottesville, Virginia 22908, USA

<sup>4</sup>Department of Molecular Physiology and Biophysics, Vanderbilt University School of Medicine, Nashville, TN 37232, USA

<sup>5</sup>Department of Chemical and Biomolecular Engineering, Vanderbilt University School of Engineering, Nashville, TN 37232, USA

\*Correspondence

Anders Wallqvist

Phone: 301-619-1989, Fax: 301-619-1983

E-mail: [sven.a.wallqvist.civ@mail.mil](mailto:sven.a.wallqvist.civ@mail.mil)

[Jamey D. Young](#)

[Phone: 615-343-4253](tel:615-343-4253), [Fax: 615-343-7951](tel:615-343-7951)

[Email: j.d.young@vanderbilt.edu](mailto:j.d.young@vanderbilt.edu)

Venkat R. Pannala

Phone: 301-619-1976, Fax: 301-619-1983

E-mail: [ypannala@bhsai.org](mailto:ypannala@bhsai.org)

## **Supplementary Captions**

**Figure S1:** Summary of APAP-induced gene and metabolite perturbations in the glycerophospholipid metabolism pathway.

**Figure S2:** Summary of APAP-induced gene and metabolite perturbations in the arginine and proline metabolism pathway.

**Supplementary Table S1:** Compilation of kidney metabolic functional tasks

**Supplementary Table S2:** Global metabolomic profiling analysis of urine

**Supplementary Table S3:** Compilation of literature data on the uptake/secretion rates for the liver and kidney

**Supplementary Table S4:** Results of RNA-sequencing analysis for the liver and kidney

**Supplementary Table S5:** Global metabolomic profiling analysis of blood

**Supplementary Table S6:** Model comparison and list of potential metabolites in the highly enriched pathways

**Supplementary Table S7:** Multi-tissue model predictions for blood and urine metabolite changes

**iRnoMTmodel:** SBML version of the rat multi-tissue model

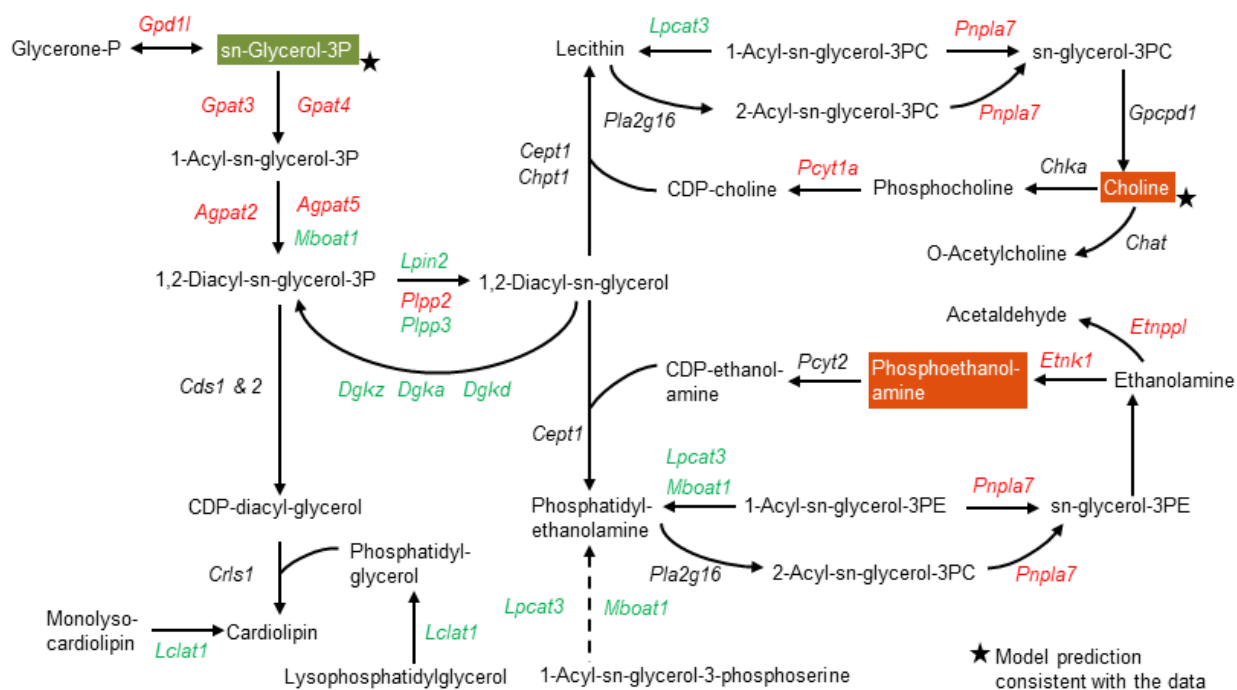

**Figure S1:** Summary of APAP-induced gene and metabolite perturbations in the glycerophospholipid metabolism pathway. Each arrow indicates the direction of a reaction converting a substrate into a product, with the name of the gene indicated next to the arrow. Upregulated and downregulated genes are shown in red and green, respectively. Increased and decreased metabolites in the plasma are shown in white text with red and green backgrounds, respectively. Stars indicate model predictions consistent with the data. Dashed arrows indicate multiple steps involved in a reaction; the dotted line indicates metabolite precursors involved in other pathways.

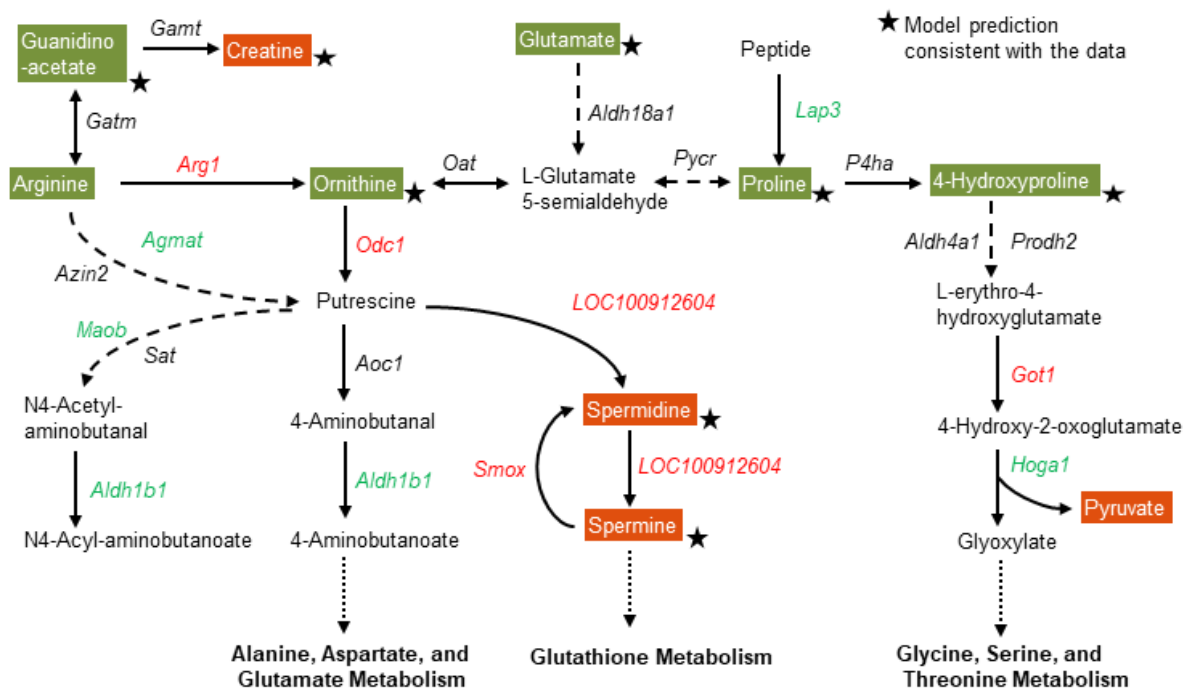

**Figure S2:** Summary of APAP-induced gene and metabolite perturbations in the arginine and proline metabolism pathway. Each arrow indicates the direction of a reaction converting a substrate into a product, with the name of the gene indicated next to the arrow. Upregulated and downregulated genes are shown in red and green, respectively. Increased and decreased metabolites in the plasma are shown in white text with red and green backgrounds, respectively. Stars indicate model predictions consistent with the data. Dashed arrows indicate multiple steps involved in the reaction; the dotted line indicates metabolite precursors involved in other pathways.
